# Supplementary material for: CSF proteome profiling reveals highly specific biomarkers for dementia with Lewy bodies
Source: bioRxiv or medRxiv preprint supplement (doi:10.1101/2023.07.10.23292447), 2023-07-12
Supplement: Supplementary file [file media-1.pdf]

Extended data Table 1. CSF Proteins differentially regulated across the different diagnostic groups.

|          |                    | PROTEINS DIFFERENTIALLY REGULATED IN THE DISCOVERY COHORT |          |                 |                      |          |                 |                      |          |                 |
|----------|--------------------|-----------------------------------------------------------|----------|-----------------|----------------------|----------|-----------------|----------------------|----------|-----------------|
| Uniprot  | Name               | DLB vs CON<br>(n=299)                                     |          |                 | DLB vs AD<br>(n=344) |          |                 | AD vs CON<br>(n=425) |          |                 |
|          |                    | Effect                                                    | p-value  | q-value         | Effect               | p-value  | q-value         | Effect               | p-value  | q-value         |
| P20711   | DDC                | 0.954                                                     | 1.22E-25 | <b>8.08E-23</b> | 0.643                | 2.05E-19 | <b>4.55E-17</b> | 0.297                | 3.10E-07 | <b>5.03E-06</b> |
| P01241   | GH                 | 0.864                                                     | 2.99E-08 | <b>9.95E-06</b> | 0.292                | 2.01E-02 | <b>2.91E-02</b> | 0.597                | 1.86E-07 | <b>3.18E-06</b> |
| P06850   | CRH                | -0.484                                                    | 1.97E-06 | <b>4.37E-04</b> | -0.833               | 2.82E-22 | <b>1.09E-19</b> | 0.208                | 2.71E-03 | <b>1.11E-02</b> |
| P06734   | FCER2              | -0.575                                                    | 1.56E-05 | <b>2.59E-03</b> | -0.677               | 7.31E-11 | <b>1.33E-09</b> | -0.012               | 9.00E-01 | 9.23E-01        |
| O75356   | ENTPD5             | 0.271                                                     | 2.80E-05 | <b>3.11E-03</b> | 0.216                | 1.73E-05 | <b>4.88E-05</b> | 0.056                | 1.88E-01 | 2.82E-01        |
| P03956   | MMP-1              | -0.579                                                    | 2.71E-05 | <b>3.11E-03</b> | -0.430               | 3.84E-04 | <b>8.18E-04</b> | -0.082               | 4.32E-01 | 5.33E-01        |
| P42785   | PRCP               | 0.367                                                     | 7.40E-05 | <b>6.99E-03</b> | 0.139                | 2.27E-02 | <b>3.23E-02</b> | 0.162                | 1.12E-02 | <b>3.41E-02</b> |
| Q16719   | KYNU               | 0.347                                                     | 8.41E-05 | <b>6.99E-03</b> | 0.132                | 6.42E-02 | 8.17E-02        | 0.129                | 3.53E-02 | 7.77E-02        |
| P02462   | COL4A1             | -0.384                                                    | 1.55E-04 | <b>1.03E-02</b> | -0.379               | 7.60E-06 | <b>2.33E-05</b> | -0.065               | 3.41E-01 | 4.44E-01        |
| P35475   | IDUA               | 0.423                                                     | 1.53E-04 | <b>1.03E-02</b> | 0.224                | 8.43E-03 | <b>1.32E-02</b> | 0.094                | 2.27E-01 | 3.23E-01        |
| Q9Y5W5   | WIF-1              | -0.366                                                    | 1.77E-04 | <b>1.07E-02</b> | -0.457               | 1.66E-08 | <b>1.08E-07</b> | -0.044               | 5.26E-01 | 6.15E-01        |
| P19021   | PAM                | -0.360                                                    | 2.84E-04 | <b>1.57E-02</b> | -0.527               | 5.63E-12 | <b>1.78E-10</b> | 0.060                | 3.39E-01 | 4.42E-01        |
| P15692   | VEGFA              | -0.239                                                    | 3.84E-04 | <b>1.96E-02</b> | -0.359               | 8.36E-11 | <b>1.43E-09</b> | 0.003                | 9.42E-01 | 9.54E-01        |
| P53634   | CTSC               | -0.257                                                    | 8.67E-04 | <b>4.12E-02</b> | -0.186               | 2.47E-03 | <b>4.19E-03</b> | -0.055               | 3.23E-01 | 4.25E-01        |
| P12644   | BMP-4              | -0.269                                                    | 1.15E-03 | 5.09E-02        | -0.313               | 2.80E-06 | <b>9.81E-06</b> | 0.003                | 9.66E-01 | 9.74E-01        |
| O43927   | CXCL13             | 0.333                                                     | 1.35E-03 | 5.15E-02        | -0.091               | 3.57E-01 | 3.98E-01        | 0.260                | 6.34E-04 | <b>3.65E-03</b> |
| P19957   | PI3                | 0.274                                                     | 1.39E-03 | 5.15E-02        | 0.155                | 5.10E-02 | 6.64E-02        | 0.115                | 8.33E-02 | 1.50E-01        |
| P10144   | GZMB               | 0.201                                                     | 1.29E-03 | 5.15E-02        | 0.165                | 6.00E-04 | <b>1.19E-03</b> | 0.005                | 9.12E-01 | 9.33E-01        |
| Q96D42   | KIM1               | -0.208                                                    | 1.81E-03 | 6.35E-02        | -0.322               | 4.04E-08 | <b>2.30E-07</b> | 0.023                | 6.25E-01 | 7.01E-01        |
| P08254   | MMP-3              | -0.346                                                    | 2.08E-03 | 6.92E-02        | -0.726               | 2.17E-17 | <b>2.89E-15</b> | 0.360                | 5.68E-06 | <b>6.19E-05</b> |
| P55285   | CDH6               | -0.239                                                    | 2.77E-03 | 8.76E-02        | -0.410               | 1.57E-10 | <b>2.55E-09</b> | 0.066                | 2.34E-01 | 3.31E-01        |
| Q9NQX5   | NPDC1              | -0.045                                                    | 3.16E-03 | 9.55E-02        | -0.042               | 5.52E-04 | <b>1.11E-03</b> | 0.006                | 5.85E-01 | 6.65E-01        |
| P51888   | PRELP              | 0.131                                                     | 3.61E-03 | 9.64E-02        | 0.042                | 2.16E-01 | 2.50E-01        | 0.056                | 7.99E-02 | 1.46E-01        |
| Q9BQT9   | CLSTN3             | -0.197                                                    | 3.35E-03 | 9.64E-02        | -0.346               | 4.38E-11 | <b>1.00E-09</b> | 0.061                | 1.58E-01 | 2.47E-01        |
| O00451   | GFRA2              | -0.130                                                    | 3.62E-03 | 9.64E-02        | -0.170               | 2.61E-08 | <b>1.58E-07</b> | 0.007                | 7.87E-01 | 8.31E-01        |
| Q99497   | PARK7              | 0.289                                                     | 4.14E-03 | 1.06E-01        | -0.247               | 5.14E-04 | <b>1.04E-03</b> | 0.436                | 3.57E-09 | <b>8.79E-08</b> |
| P02452   | COL1A1             | -0.164                                                    | 4.30E-03 | 1.06E-01        | -0.248               | 2.23E-08 | <b>1.40E-07</b> | 0.062                | 1.17E-01 | 1.95E-01        |
| O75594   | PGLYRP1            | 0.266                                                     | 5.91E-03 | 1.25E-01        | 0.008                | 9.19E-01 | 9.34E-01        | 0.189                | 1.25E-02 | <b>3.64E-02</b> |
| O95185   | UNC5C              | -0.202                                                    | 5.38E-03 | 1.25E-01        | -0.391               | 1.94E-11 | <b>4.77E-10</b> | 0.084                | 8.41E-02 | 1.51E-01        |
| Q9HCK4   | ROBO2              | -0.270                                                    | 5.85E-03 | 1.25E-01        | -0.504               | 8.64E-11 | <b>1.44E-09</b> | 0.107                | 1.06E-01 | 1.79E-01        |
| P80370   | DLK-1              | -0.216                                                    | 5.96E-03 | 1.25E-01        | -0.335               | 8.04E-08 | <b>4.24E-07</b> | 0.078                | 1.77E-01 | 2.69E-01        |
| O60259   | hK8                | -0.196                                                    | 6.03E-03 | 1.25E-01        | -0.190               | 2.35E-03 | <b>3.99E-03</b> | -0.045               | 3.94E-01 | 4.93E-01        |
| O43155   | FLRT2              | -0.183                                                    | 6.23E-03 | 1.25E-01        | -0.328               | 3.82E-09 | <b>3.68E-08</b> | 0.080                | 9.13E-02 | 1.60E-01        |
| Q9BYH1   | SEZ6L              | -0.058                                                    | 7.01E-03 | 1.37E-01        | -0.095               | 1.40E-09 | <b>1.69E-08</b> | 0.015                | 2.46E-01 | 3.42E-01        |
| Q6NWX40  | RGMB               | -0.165                                                    | 7.43E-03 | 1.37E-01        | -0.290               | 3.37E-10 | <b>5.09E-09</b> | 0.054                | 1.68E-01 | 2.58E-01        |
| P05067   | APP                | -0.089                                                    | 7.34E-03 | 1.37E-01        | -0.139               | 7.50E-09 | <b>5.94E-08</b> | 0.019                | 3.63E-01 | 4.66E-01        |
| Q96PQ0   | SORCS2             | -0.075                                                    | 8.04E-03 | 1.41E-01        | -0.119               | 1.79E-09 | <b>2.09E-08</b> | 0.043                | 1.50E-02 | <b>4.27E-02</b> |
| Q9BZR6   | RTN4R              | -0.146                                                    | 8.09E-03 | 1.41E-01        | -0.191               | 1.98E-05 | <b>5.47E-05</b> | 0.017                | 6.45E-01 | 7.15E-01        |
| Q9NQ88   | TIGAR              | 0.095                                                     | 9.51E-03 | 1.58E-01        | -0.114               | 4.00E-04 | <b>8.48E-04</b> | 0.164                | 1.94E-08 | <b>4.03E-07</b> |
| P50591   | TRAIL              | -0.131                                                    | 9.81E-03 | 1.59E-01        | -0.217               | 1.04E-06 | <b>4.10E-06</b> | 0.034                | 3.78E-01 | 4.80E-01        |
| Q9UHF1   | EGFL7              | -0.184                                                    | 1.02E-02 | 1.62E-01        | -0.352               | 4.37E-08 | <b>2.44E-07</b> | 0.038                | 4.76E-01 | 5.75E-01        |
| Q6UX15   | LAYN               | -0.223                                                    | 1.07E-02 | 1.65E-01        | -0.389               | 4.85E-09 | <b>4.30E-08</b> | 0.107                | 5.93E-02 | 1.17E-01        |
| O95727   | CRTAM              | -0.132                                                    | 1.11E-02 | 1.67E-01        | -0.220               | 2.15E-06 | <b>7.63E-06</b> | 0.017                | 6.51E-01 | 7.19E-01        |
| P16234   | DGF-R- $\alpha$ 1p | -0.168                                                    | 1.14E-02 | 1.69E-01        | -0.279               | 3.92E-07 | <b>1.76E-06</b> | 0.030                | 5.09E-01 | 6.02E-01        |
| O95750   | FGF-19             | -0.220                                                    | 1.17E-02 | 1.69E-01        | -0.379               | 5.27E-08 | <b>2.87E-07</b> | 0.000                | 9.94E-01 | 9.96E-01        |
| P78423   | CX3CL1             | -0.177                                                    | 1.25E-02 | 1.69E-01        | -0.446               | 1.23E-14 | <b>8.19E-13</b> | 0.166                | 9.95E-04 | <b>5.21E-03</b> |
| Q8TAD2   | IL-17D             | 0.170                                                     | 1.23E-02 | 1.69E-01        | -0.049               | 3.91E-01 | 4.32E-01        | 0.143                | 7.51E-03 | <b>2.56E-02</b> |
| Q8NEV9,Q | IL-27              | 0.173                                                     | 1.32E-02 | 1.69E-01        | -0.021               | 7.12E-01 | 7.47E-01        | 0.131                | 9.34E-03 | <b>2.97E-02</b> |
| P80162   | CXCL6              | 0.237                                                     | 1.24E-02 | 1.69E-01        | -0.010               | 8.97E-01 | 9.17E-01        | 0.153                | 3.41E-02 | 7.62E-02        |
| Q14508   | WFDC2              | -0.086                                                    | 1.28E-02 | 1.69E-01        | -0.168               | 4.54E-09 | <b>4.08E-08</b> | 0.048                | 4.10E-02 | 8.71E-02        |
| Q96B86   | RGMA               | -0.091                                                    | 1.31E-02 | 1.69E-01        | -0.181               | 7.58E-11 | <b>1.33E-09</b> | 0.046                | 4.64E-02 | 9.61E-02        |
| P10147   | CCL3               | 0.173                                                     | 1.41E-02 | 1.77E-01        | -0.161               | 4.07E-03 | <b>6.65E-03</b> | 0.331                | 1.61E-10 | <b>5.11E-09</b> |
| P18065   | IGFBP-2            | -0.140                                                    | 1.45E-02 | 1.79E-01        | -0.229               | 1.10E-07 | <b>5.52E-07</b> | 0.084                | 2.48E-02 | 6.20E-02        |
| O43505   | B4GAT1             | -0.082                                                    | 1.49E-02 | 1.80E-01        | -0.125               | 9.39E-08 | <b>4.81E-07</b> | 0.031                | 1.31E-01 | 2.13E-01        |
| Q9BUD6   | SPON2              | -0.115                                                    | 1.52E-02 | 1.81E-01        | -0.126               | 1.37E-03 | <b>2.41E-03</b> | -0.065               | 7.30E-02 | 1.37E-01        |
| P50579   | MetAP 2            | 0.117                                                     | 1.69E-02 | 1.91E-01        | -0.147               | 2.99E-05 | <b>7.82E-05</b> | 0.203                | 3.01E-08 | <b>5.97E-07</b> |
| O75509   | TNFRSF21           | -0.065                                                    | 1.67E-02 | 1.91E-01        | -0.107               | 8.14E-09 | <b>6.29E-08</b> | 0.022                | 1.80E-01 | 2.72E-01        |
| P41271   | NBL1               | 0.091                                                     | 1.67E-02 | 1.91E-01        | 0.207                | 1.04E-08 | <b>7.59E-08</b> | -0.035               | 2.50E-01 | 3.46E-01        |
| P31431   | SDC4               | 0.138                                                     | 1.95E-02 | 2.14E-01        | -0.319               | 5.37E-11 | <b>1.11E-09</b> | 0.447                | 1.31E-21 | <b>2.90E-19</b> |
| Q8NFT8   | DNER               | -0.049                                                    | 2.06E-02 | 2.14E-01        | -0.090               | 1.36E-08 | <b>9.23E-08</b> | 0.041                | 9.64E-04 | <b>5.12E-03</b> |
| Q9Y275   | TNFSF13B           | -0.195                                                    | 2.01E-02 | 2.14E-01        | -0.391               | 1.07E-08 | <b>7.65E-08</b> | 0.199                | 1.59E-03 | <b>7.61E-03</b> |
| P21246   | PTN                | -0.091                                                    | 2.05E-02 | 2.14E-01        | 0.011                | 7.60E-01 | 7.92E-01        | -0.073               | 2.99E-02 | 7.08E-02        |
| Q9UNE0   | EDAR               | 0.089                                                     | 1.97E-02 | 2.14E-01        | -0.001               | 9.87E-01 | 9.87E-01        | 0.049                | 9.98E-02 | 1.72E-01        |
| Q2TAL6   | VWC2               | -0.183                                                    | 2.10E-02 | 2.15E-01        | -0.439               | 8.65E-12 | <b>2.40E-10</b> | 0.114                | 3.32E-02 | 7.56E-02        |
| Q16627   | CCL14              | 0.196                                                     | 2.20E-02 | 2.22E-01        | 0.002                | 9.82E-01 | 9.83E-01        | 0.136                | 3.34E-02 | 7.57E-02        |
| Q96P11   | SCGB3A2            | 0.136                                                     | 2.30E-02 | 2.28E-01        | -0.038               | 5.05E-01 | 5.47E-01        | 0.129                | 1.05E-02 | <b>3.27E-02</b> |
| P36222   | CHI3L1             | -0.056                                                    | 2.40E-02 | 2.33E-01        | 0.023                | 2.25E-01 | 2.60E-01        | -0.012               | 5.24E-01 | 6.15E-01        |
| Q8TEU8   | WFIKK2             | -0.226                                                    | 2.41E-02 | 2.33E-01        | -0.290               | 2.01E-04 | <b>4.56E-04</b> | 0.045                | 5.27E-01 | 6.15E-01        |
| P25116   | PAR-1              | 0.394                                                     | 2.63E-02 | 2.50E-01        | -0.017               | 9.13E-01 | 9.30E-01        | 0.360                | 1.08E-02 | <b>3.35E-02</b> |
| O94779   | CNTN5              | -0.162                                                    | 2.89E-02 | 2.60E-01        | -0.404               | 3.23E-12 | <b>1.07E-10</b> | 0.144                | 2.63E-03 | <b>1.09E-02</b> |
| Q96924   | RELT               | -0.195                                                    | 2.78E-02 | 2.60E-01        | -0.472               | 6.50E-12 | <b>1.97E-10</b> | 0.170                | 5.45E-03 | <b>2.00E-02</b> |
| P24387   | CRHBP              | -0.136                                                    | 2.82E-02 | 2.60E-01        | -0.121               | 9.56E-03 | <b>1.48E-02</b> | -0.049               | 2.85E-01 | 3.87E-01        |
| Q9UBT3   | Dkk-4              | -0.152                                                    | 2.87E-02 | 2.60E-01        | -0.272               | 1.68E-06 | <b>6.12E-06</b> | 0.019                | 7.04E-01 | 7.56E-01        |
| Q9NP99   | TREM1              | 0.115                                                     | 3.08E-02 | 2.70E-01        | -0.282               | 1.09E-06 | <b>4.21E-06</b> | 0.363                | 1.07E-13 | <b>5.09E-12</b> |
| Q92520   | FAM3C              | -0.028                                                    | 3.06E-02 | 2.70E-01        | -0.016               | 1.67E-01 | 1.97E-01        | 0.006                | 5.53E-01 | 6.36E-01        |
| P13688   | CEACAM1            | 0.146                                                     | 3.23E-02 | 2.79E-01        | -0.025               | 6.70E-01 | 7.07E-01        | 0.055                | 2.95E-01 | 3.97E-01        |
| Q8TC22   | CD99L2             | -0.081                                                    | 3.42E-02 | 2.88E-01        | -0.156               | 7.42E-09 | <b>5.94E-08</b> | 0.050                | 4.32E-02 | 9.12E-02        |
| P15151   | PVR                | -0.170                                                    | 3.41E-02 | 2.88E-01        | -0.399               | 2.72E-09 | <b>2.89E-08</b> | 0.109                | 5.91E-02 | 1.17E-01        |
| O00548   | DLL1               | -0.161                                                    | 3.54E-02 | 2.94E-01        | -0.375               | 7.37E-09 | <b>5.94E-08</b> | 0.089                | 9.82E-02 | 1.70E-01        |
| P12544   | GZMA               | -0.162                                                    | 3.65E-02 | 2.99E-01        | -0.231               | 4.15E-04 | <b>8.71E-04</b> | 0.036                | 5.42E-01 | 6.30E-01        |
| Q725A7   | FAM19A5            | -0.058                                                    | 3.96E-02 | 3.18E-01        | -0.101               | 1.17E-08 | <b>8.22E-08</b> | 0.023                | 2.12E-01 | 3.08E-01        |
| O43240   | KLK10              | -0.198                                                    | 3.95E-02 | 3.18E-01        | -0.264               | 8.99E-04 | <b>1.69E-03</b> | 0.040                | 5.67E-01 | 6.47E-01        |
| Q8NB7    | PCSK9              | -0.143                                                    | 4.08E-02 | 3.23E-01        | -0.257               | 4.85E-06 | <b>1.56E-05</b> | 0.031                | 5.15E-01 | 6.07E-01        |
| Q9H5V8   | CDCP1              | 0.158                                                     | 4.36E-02 | 3.38E-01        | -0.056               | 3.64E-01 | 4.05E-01        | 0.126                | 1.90E-02 | 5.16E-02        |
| P35318   | ADM                | -0.120                                                    | 4.38E-02 | 3.38E-01        | -0.270               | 9.93E-09 | <b>7.42E-08</b> | 0.081                | 4.81E-02 | 9.86E-02        |
| Q9NZ53   | PODXL2             | -0.074                                                    | 4.49E-02 | 3.43E-01        | -0.124               | 1.66E-06 | <b>6.10E-06</b> | 0.022                | 3.60E-01 | 4.64E-01        |
| O60462   | NRP2               | -0.119                                                    | 4.67E-02 | 3.53E-01        | -0.253               | 5.38E-07 | <b>2.29E-06</b> | 0.089                | 3.56E-02 | 7.80E-02        |
| P57087   | JAM-B              | -0.095                                                    | 4.81E-02 | 3.59E-01        | -0.213               | 4.38E-09 | <b>3.99E-08</b> | 0.058                | 7.42E-02 | 1.38E-01        |
| O14793   | GDF-8              | -0.123                                                    | 4.98E-02 | 3.65E-01        | -0.245               | 3.35E-06 | <b>1.14E-05</b> | 0.040                |          |                 |
