# Supplementary material for: CSF proteome profiling reveals highly specific biomarkers for dementia with Lewy bodies
Source: bioRxiv or medRxiv preprint supplement (doi:10.1101/2023.07.10.23292447), 2023-07-12
Supplement: Supplementary file [file media-3.pdf]

**Supplementary Table 1. Biomarkers supporting DLB diagnosis across cohorts**

|                                                             | <b>Discovery cohort</b> | <b>Validation cohort 1</b> | <b>Validation cohort 2</b> | <b>Autopsy cohort</b> |
|-------------------------------------------------------------|-------------------------|----------------------------|----------------------------|-----------------------|
| <b>Autopsy confirmed, n (%)</b>                             | 14 (13%)                | 0 (0%)                     | 0 (0%)                     | 17 (100%)             |
| <b>Clinical based diagnosis, n (%)</b>                      | 95 (87%)                | 54 (100%)                  | 55 (100%)                  | na                    |
| <b>DAT-SPECT, n abnormal (%)</b>                            | 23 (24%)                | 19 (35%)                   | 21 (38%)                   | na                    |
| <b>EEG, n abnormal (%)</b>                                  | 41 (43%)                | 28 (51%)                   | na                         | na                    |
| <b>No autopsy or supporting biomarkers available, n (%)</b> | 48 (44%)                | 18 (33%)                   | 27 (49%)                   | na                    |

Abbreviations: DAT-SPECT: SPECT single-photon emission computed tomography; EEG: electroencephalography.

Supplementary Table 2. Proteins that passed the quality control and were included in the analysis

| Name                                                             | Abbreviation   | Uniprot  | Olink panel(s)          | CSF Detectability      |
|------------------------------------------------------------------|----------------|----------|-------------------------|------------------------|
| C-C motif chemokine 24                                           | CCL24          | O00175   | CVD III                 | 91.22%                 |
| Galectin-9                                                       | Gal-9          | O00192   | CVD II                  | 100.00%                |
| Galectin-8                                                       | gal-8          | O00214   | Neuro                   | 99.90%                 |
| Tumor necrosis factor receptor superfamily member 10A            | TNFRSF10A      | O00220   | CVD II, Cell-Reg        | 100%; 100%             |
| Signal-regulatory protein beta-1                                 | SIRPB1         | O00241   | Dev                     | 100.00%                |
| Asouti-related protein                                           | AGRP           | O00253   | CVD II                  | 100.00%                |
| DNA fragmentation factor subunit alpha                           | DFFA           | O00273   | IR                      | 100.00%                |
| Osteoprotegerin                                                  | OPG            | O00300   | Inf, CVD III            | 100%; 100%             |
| Matrilin-2                                                       | MATN2          | O00339   | Dev                     | 100.00%                |
| GDNF family receptor alpha-2                                     | GFRA2          | O00451   | Cell-Reg                | 100.00%                |
| Neural cell adhesion molecule L1-like protein                    | CHL1           | O00533   | C-Met                   | 100.00%                |
| Delta-like protein 1                                             | DLL1           | O00548   | Onc II                  | 100.00%                |
| C-C motif chemokine 21                                           | CCL21          | O00585   | Dev                     | 96.79%                 |
| Podocalyxin                                                      | PODXL          | O00592   | Onc II                  | 99.69%                 |
| Protein CYR61                                                    | CYR61          | O00622   | Onc II                  | 100.00%                |
| Neurocan core protein                                            | NCAN           | O14594   | Neuro                   | 100.00%                |
| C-X-C motif chemokine 11                                         | CXCL11         | O14625   | Inf                     | 99.90%                 |
| TNF-related apoptosis-inducing ligand receptor 2                 | TRAIL-R2       | O14763   | CVD II                  | 100.00%                |
| Tripeptidyl-peptidase 1                                          | TPP1           | O14773   | Dev                     | 100.00%                |
| Growth/differentiation factor 8                                  | GDF-8          | O14793   | Neuro                   | 100.00%                |
| Tumor necrosis factor receptor superfamily member 10C            | TNFRSF10C      | O14798   | CVD III                 | 100.00%                |
| Secretory carrier-associated membrane protein 3                  | SCAMP3         | O14828   | Onc II                  | 100.00%                |
| Tumor necrosis factor receptor superfamily member 13B            | TNFRSF13B      | O14836   | CVD II                  | 100.00%                |
| Protein Wnt-9a                                                   | WNT9A          | O14904   | Cell-Reg                | 90.49%                 |
| Protocadherin-17                                                 | PCHD17         | O14917   | Cell-Reg                | 100.00%                |
| Plexin-B2                                                        | PLXNB2         | O15031   | C-Met                   | 100.00%                |
| Angiopoietin-2                                                   | ANGPT2         | O15123   | Met                     | 100.00%                |
| Ephrin type-B receptor 6                                         | EPHB6          | O15197   | Neuro                   | 99.90%                 |
| Matrilin-3                                                       | MATN3          | O15232   | Neuro                   | 100.00%                |
| C-C motif chemokine 25                                           | CCL25          | O15444   | Inf                     | 97.52%                 |
| Toll-like receptor 3                                             | TLR3           | O15455   | Onc II                  | 100.00%                |
| C-C motif chemokine 16                                           | CCL16          | O15467   | CVD III                 | 100.00%                |
| Leucine-rich repeat transmembrane protein FLRT2                  | FLRT2          | O43155   | Neuro                   | 99.90%                 |
| Plexin-B1                                                        | PLXNB1         | O43157   | Neuro                   | 100.00%                |
| Kallistatin-10                                                   | KLK10          | O43240   | Met                     | 100.00%                |
| Kunitz-type protease inhibitor 1                                 | SPINT1         | O43278   | Dev                     | 100.00%                |
| Kunitz-type protease inhibitor 2                                 | SPINT2         | O43291   | Dev                     | 100.00%                |
| Cochlin                                                          | COCH           | O43405   | Dev                     | 100.00%                |
| Beta-1,4-glucuronyltransferase 1                                 | B4GAT1         | O43505   | Dev                     | 100.00%                |
| Tumor necrosis factor (ligand) superfamily, member 12            | TWEAK          | O43508   | Inf                     | 100.00%                |
| Bcl-2-like protein 11 isoform BimL                               | BCL2L11        | O43521-2 | Cell-Reg                | 100.00%                |
| Tumor necrosis factor ligand superfamily member 14               | TNFSF14        | O43557   | Inf                     | 96.59%                 |
| Carbonic anhydrase 12                                            | CA12           | O43570   | OD                      | 99.48%                 |
| Protein sprouty homolog 2                                        | SPRY2          | O43597   | IR                      | 100.00%                |
| Integral membrane protein 2A                                     | ITM2A          | O43736   | IR                      | 100.00%                |
| Angiopoietin-related protein 7                                   | ANGPTL7        | O43827   | Met                     | 100.00%                |
| EGF-like repeat and discoidin I-like domain-containing protein 3 | EDIL3          | O43854   | OD                      | 99.90%                 |
| Xaa-Pro aminopeptidase 2                                         | XPNPEP2        | O43895   | Onc II                  | 97.52%                 |
| Vascular endothelial growth factor D                             | VEGFD          | O43915   | CVD II, Cell-Reg        | 100%; 99.79%           |
| C-X-C motif chemokine 13                                         | CXCL13         | O43927   | Onc II                  | 100.00%                |
| Heparan-sulfate 6-O-sulfotransferase 1                           | HSST1          | O60243   | Cell-Reg                | 100.00%                |
| Kallistatin-8                                                    | hK8            | O60259   | Onc II                  | 100.00%                |
| Neurospilin-2                                                    | NRP2           | O60462   | Neuro                   | 99.69%                 |
| GDNF family receptor alpha-3                                     | GDNFR-alpha-3  | O60609   | Neuro                   | 100.00%                |
| Cathepsin L2                                                     | CTSV           | O60911   | Onc II                  | 100.00%                |
| Low affinity immunoglobulin gamma Fc region receptor III-B       | FCGR3B         | O75015   | C-Met                   | 100.00%                |
| Leukocyte immunoglobulin-like receptor subfamily B member 5      | LILRB5         | O75023   | C-Met                   | 99.28%                 |
| Immunoglobulin superfamily member 3                              | IGSF3          | O75054   | Cell-Reg                | 100.00%                |
| Disintegrin and metalloproteinase domain-containing protein 23   | ADAM 23        | O75077   | Neuro                   | 100.00%                |
| ICOS ligand                                                      | ICOSLG         | O75144   | Onc II                  | 100.00%                |
| Semaphorin-7A                                                    | SEMA7A         | O75326   | Dev                     | 100.00%                |
| Ectonucleoside triphosphate diphosphohydrolase 6                 | ENTPD6         | O75354   | OD, Cell-Reg            | 100%; 99.79%           |
| Ectonucleoside triphosphate diphosphohydrolase 5                 | ENTPD5         | O75356   | Met                     | 98.97%                 |
| Tumor necrosis factor receptor superfamily member 21             | TNFRSF21       | O75509   | Neuro                   | 100.00%                |
| Peptidoglycan recognition protein 1                              | PGLYRP1        | O75594   | CVD III                 | 100.00%                |
| Tumor necrosis factor ligand superfamily member 13               | TNFSF13        | O75888   | Onc II                  | 100.00%                |
| N(G),N(G)-dimethylarginine dimethylaminohydrolase 1 (DDAH1)      | DDAH1          | O94760   | Cell-Reg                | 100.00%                |
| Contactin-5                                                      | CNTN5          | O94779   | Neuro                   | 100.00%                |
| Dickkopf-related protein 1                                       | Dkk-1          | O94907   | CVD II                  | 100.00%                |
| Vesicle-associated membrane protein 5                            | VAMP5          | O95183   | Cell-Reg                | 89.45%                 |
| Netrin receptor UNC5C                                            | UNC5C          | O95185   | Neuro                   | 99.90%                 |
| WNT1-inducible-signaling pathway protein 1                       | WISP-1         | O95388   | Onc II                  | 100.00%                |
| Tumor necrosis factor receptor superfamily member 6B             | TNFRSF6B       | O95407   | Onc II                  | 100.00%                |
| Apolipoprotein M                                                 | APOM           | O95445   | C-Met                   | 98.76%                 |
| Neuronal pentraxin receptor                                      | NPTXR          | O95502   | Met                     | 100.00%                |
| NAD kinase                                                       | DK             | O95544   | Met                     | 99.90%                 |
| Folliculin-related protein 3                                     | FSTL3          | O95633   | Dev                     | 100.00%                |
| Synaptosomal-associated protein 29                               | SP29           | O95721   | Dev                     | 100.00%                |
| Cytotoxic and regulatory T-cell molecule                         | CRTAM          | O95727   | Neuro                   | 92.98%                 |
| Fibroblast growth factor 19                                      | FGF-19         | O95750   | Inf                     | 100.00%                |
| Angiopoietin-related protein 1                                   | ANGPTL1        | O95841   | Met                     | 100.00%                |
| CD160 antigen                                                    | CD160          | O95971   | Onc II                  | 99.90%                 |
| Interleukin-18-binding protein                                   | IL-18BP        | O95998   | CVD III                 | 100.00%                |
| Superoxide dismutase (Cu-Zn)                                     | SOD1           | P00441   | C-Met                   | 100.00%                |
| Tyrosine-protein kinase ABL1                                     | ABL1           | P00519   | Onc II                  | 100.00%                |
| Epidermal growth factor receptor                                 | EGFR           | P00533   | CVD III                 | 100.00%                |
| Urokinase-type plasminogen activator                             | uPA            | P00749   | Inf, CVD III            | 100%; 100%             |
| Tissue-type plasminogen activator                                | t-PA           | P00750   | CVD III                 | 100.00%                |
| Adenosine Deaminase                                              | ADA            | P00813   | Inf                     | 100.00%                |
| Carbonic anhydrase 2                                             | CA2            | P00918   | Dev                     | 91.11%                 |
| Serine protease inhibitor Kazal-type 1                           | SPINK1         | P00995   | Dev                     | 100.00%                |
| Metalloproteinase inhibitor 1                                    | TIMP1          | P01033   | C-Met                   | 100.00%                |
| Cystatin C                                                       | CST3           | P01034   | CVD II                  | 100.00%                |
| Platelet-derived growth factor subunit B                         | PDGF subunit B | P01127   | CVD II                  | 100.00%                |
| Low-density lipoprotein receptor                                 | LDL receptor   | P01130   | CVD III                 | 100.00%                |
| Transforming growth factor alpha                                 | TGF-alpha      | P01135   | Inf, Onc II             | 100%; 100%             |
| Latency-associated peptide transforming growth factor beta-1     | LAP TGF-beta-1 | P01137   | Inf                     | 100.00%                |
| Beta-nerve growth factor                                         | Beta-NGF       | P01138   | Inf, Neuro              | 100%; 99.9%            |
| Glycoprotein hormones alpha chain                                | CGA            | P01215   | Dev                     | 100.00%                |
| Growth hormone                                                   | GH             | P01241   | CVD II                  | 98.76%                 |
| Calcitonin                                                       | CALCA          | P01258   | OD                      | 99.90%                 |
| Pancreatic prohormone                                            | PPY            | P01298   | Onc II                  | 100.00%                |
| TNF-beta                                                         | TNFB           | P01374   | Inf                     | 98.24%                 |
| Interleukin-2 receptor subunit alpha                             | IL2-RA         | P01589   | CVD III                 | 99.48%                 |
| T-cell surface glycoprotein CD4                                  | CD4            | P01730   | CVD II                  | 100.00%                |
| Myoglobin                                                        | MB             | P02144   | CVD III                 | 100.00%                |
| Collagen alpha-1(I) chain                                        | COL1A1         | P02452   | CVD III                 | 100.00%                |
| Collagen alpha-1(V) chain                                        | COL1A1         | P02462   | Cell-Reg                | 100.00%                |
| Protein AMBP                                                     | AMBP           | P02760   | CVD II                  | 100.00%                |
| C-X-C motif chemokine 10                                         | CXCL10         | P02778   | Inf                     | 100.00%                |
| Transferrin receptor protein 1                                   | TR             | P02786   | CVD III                 | 99.79%                 |
| Angiogenin                                                       | ANG            | P03950   | C-Met                   | 100.00%                |
| Coagulation factor XI                                            | F11            | P03951   | C-Met                   | 100.00%                |
| Matrix metalloproteinase-1                                       | MMP-1          | P03956   | Inf                     | 100.00%                |
| Tissue alpha-L-fucosidase                                        | FUCA1          | P04066   | Dev                     | 100.00%                |
| Vitamin K-dependent protein C                                    | PROC           | P04070   | C-Met                   | 100.00%                |
| Cystatin-B                                                       | CSTB           | P04080   | CVD III                 | 100.00%                |
| Platelet-derived growth factor subunit A                         | PDGF subunit A | P04085   | CVD III                 | 100.00%                |
| Superoxide dismutase (Mn), mitochondrial                         | SOD2           | P04179   | CVD II                  | 100.00%                |
| Thy-1 membrane glycoprotein                                      | THY 1          | P04216   | Neuro                   | 100.00%                |
| HLA class II histocompatibility antigen gamma chain              | CD74           | P04233   | Dev                     | 99.38%                 |
| von Willebrand factor                                            | vWF            | P04275   | CVD III                 | 97.52%                 |
| Receptor tyrosine-protein kinase erbB-2                          | ErbB2/HER2     | P04626   | Onc II                  | 100.00%                |
| Heat shock 27 kDa protein                                        | HSP 27         | P04792   | CVD II                  | 100.00%                |
| Amyloid beta A4 protein                                          | AβP            | P05067   | Dev                     | 100.00%                |
| Integrin beta-2                                                  | ITGB2          | P05107   | CVD III                 | 100.00%                |
| Plasminogen activator inhibitor 1                                | PAI            | P05121   | CVD III                 | 100.00%                |
| Plasma serine protease inhibitor                                 | SERPINA5       | P05154   | C-Met                   | 100.00%                |
| Interleukin-6                                                    | IL6            | P05231   | Inf, Onc II, CVD II, IR | 100%; 100%; 100%; 100% |
| Intercellular adhesion molecule 1                                | ICAM1          | P05362   | C-Met                   | 100.00%                |
| Lithostathine-1-alpha                                            | REG1A          | P05451   | C-Met                   | 100.00%                |
| Thyroxine-binding globulin                                       | SERPINA7       | P05543   | C-Met                   | 99.59%                 |
| Integrin beta-1                                                  | ITGB1          | P05556   | Dev                     | 100.00%                |
| T-cell surface glycoprotein CD5                                  | CD5            | P06127   | Inf                     | 100.00%                |
| Complement C2                                                    | C2             | P06681   | C-Met                   | 100.00%                |

|                                                                         |                |        |                     |            |
|-------------------------------------------------------------------------|----------------|--------|---------------------|------------|
| Low affinity immunoglobulin epsilon Fc receptor                         | FCER2          | P06734 | Dev                 | 100.00%    |
| Integrin alpha-V                                                        | ITGAV          | P06756 | Onc II              | 100.00%    |
| Corticosterin                                                           | CRH            | P06850 | OD                  | 99.59%     |
| Lipoprotein lipase                                                      | LPL            | P06858 | CVD II              | 99.90%     |
| Thrombospondin 1M                                                       | THSD1          | P07204 | CVD II              | 100.00%    |
| Protein disulfide-isomerase                                             | PAHB           | P07237 | Dev                 | 95.14%     |
| Cathepsin D                                                             | CTSD           | P07339 | CVD III             | 100.00%    |
| Platelet glycoprotein Ib alpha chain                                    | GP1BA          | P07359 | C-Met               | 90.70%     |
| Carbonic anhydrase 3                                                    | CA3            | P07451 | C-Met               | 92.77%     |
| Trypsin-2                                                               | PRSS2          | P07478 | C-Met               | 99.59%     |
| Decorin                                                                 | DCN            | P07585 | CVD II              | 100.00%    |
| Cathepsin L1                                                            | CTSL1          | P07711 | CVD II              | 100.00%    |
| Tyrosine-protein kinase Yes                                             | YES1           | P07947 | OD                  | 99.79%     |
| Tyrosine-protein kinase Lyn                                             | LYN            | P07948 | Onc II              | 98.24%     |
| Proto-oncogene tyrosine-protein kinase receptor Ret                     | RET            | P07949 | Onc II              | 100.00%    |
| Insulin-like growth factor 1 receptor                                   | IGF1R          | P08069 | Onc II              | 100.00%    |
| Beta-glucuronidase                                                      | GUSB           | P08236 | Dev                 | 100.00%    |
| Matrix metalloproteinase-2                                              | MMP-2          | P08253 | CVD III             | 100.00%    |
| Matrix metalloproteinase-3                                              | MMP-3          | P08254 | CVD III             | 100.00%    |
| Nephrysin                                                               | NEP            | P08473 | Neuro               | 99.69%     |
| Hepatocyte growth factor receptor                                       | MET            | P08581 | C-Met               | 100.00%    |
| Vimentin                                                                | VIM            | P08670 | Onc II              | 94.63%     |
| Coagulation factor VII                                                  | F7             | P08709 | C-Met               | 88.43%     |
| Insulin-like growth factor-binding protein 1                            | IGFBP-1        | P08833 | CVD III             | 100.00%    |
| Interleukin-6 receptor subunit alpha                                    | IL-6RA         | P08887 | CVD III             | 100.00%    |
| Gamma-enolase                                                           | ENO2           | P09104 | Met                 | 100.00%    |
| Matrix metalloproteinase-7                                              | MMP-7          | P09237 | CVD II              | 100.00%    |
| Matrix metalloproteinase-10                                             | MMP-10         | P09238 | Inf                 | 99.79%     |
| CD48 antigen                                                            | CD48           | P09326 | Onc II              | 100.00%    |
| C-X-C motif chemokine 1                                                 | CXCL1          | P09341 | Inf,CVD II          | 100%, 100% |
| Galectin-1                                                              | Gal-1          | P09382 | Onc II              | 100.00%    |
| Dihydropteridine reductase                                              | QDPR           | P09417 | Met                 | 100.00%    |
| SPARC                                                                   | SPARC          | P09486 | Onc II              | 100.00%    |
| Heme oxygenase 1                                                        | HO-1           | P09601 | CVD II              | 99.90%     |
| Macrophage colony-stimulating factor 1                                  | CSF-1          | P09603 | Inf                 | 100.00%    |
| Platelet-derived growth factor receptor beta                            | PDGFRB         | P09619 | Dev                 | 100.00%    |
| Pro-cathepsin H                                                         | CTSH           | P09668 | Met                 | 100.00%    |
| Tumor-associated calcium signal transducer 2                            | TACSTD2        | P09758 | Cell-Reg            | 100.00%    |
| Furin                                                                   | FUR            | P09958 | Onc II              | 100.00%    |
| Cryptic protein                                                         | CFC1           | P0C637 | Cell-Reg            | 100.00%    |
| Ig lambda-2 chain C regions                                             | IGLC2          | P0D0Y2 | C-Met               | 100.00%    |
| Granzyme B                                                              | GZMB           | P10144 | Onc II              | 85.74%     |
| Interleukin-8                                                           | IL-8           | P10145 | Inf                 | 100.00%    |
| C-C motif chemokine 3                                                   | CCL3           | P10147 | Inf, CVD II         | 100%, 100% |
| Osteopontin                                                             | OPN            | P10451 | CVD III             | 100.00%    |
| Receptor-type tyrosine-protein phosphatase F                            | PTPRF          | P10586 | Dev                 | 100.00%    |
| Tissue factor pathway inhibitor                                         | TFPI           | P10646 | CVD III             | 100.00%    |
| Mast/stem cell growth factor receptor Kit                               | KIT            | P10721 | C-Met               | 100.00%    |
| Mannose-binding protein C                                               | MBL2           | P11226 | C-Met               | 99.48%     |
| Cation-independent mannose-6-phosphate receptor                         | IGF2R          | P11717 | Dev                 | 100.00%    |
| Fatty acid-binding protein, intestinal (FABP2)                          | FABP2          | P12104 | CVD II              | 97.00%     |
| Low affinity immunoglobulin gamma Fc region receptor II-a               | FCGR2A         | P12318 | C-Met               | 99.38%     |
| Granzyme A                                                              | GZMA           | P12544 | Neuro               | 99.90%     |
| Bone morphogenetic protein 4                                            | BMP-4          | P12544 | Neuro               | 99.17%     |
| Eosinophil cationic protein                                             | RSE3           | P12724 | Met                 | 99.90%     |
| Cadherin-1                                                              | CDH1           | P12830 | C-Met               | 100.00%    |
| Interleukin-7                                                           | IL-7           | P13232 | Inf                 | 97.93%     |
| C-C motif chemokine 4                                                   | CCL4           | P13236 | Inf                 | 100.00%    |
| Monocyte chemoattractant protein 1                                      | MCP-1          | P13500 | Inf, CVD III        | 100%, 100% |
| Neural cell adhesion molecule 1                                         | NCAM1          | P13591 | C-Met               | 100.00%    |
| Intercellular adhesion molecule 2                                       | ICAM-2         | P13598 | CVD III             | 100.00%    |
| Versican core protein                                                   | VCAN           | P13611 | Met                 | 100.00%    |
| Tartrate-resistant acid phosphatase type 5                              | TRAP 5         | P13686 | CVD III             | 100.00%    |
| Carcinoembryonic antigen-related cell adhesion molecule 1               | CEACAM1        | P13688 | Onc II              | 99.79%     |
| Tissue factor                                                           | TF             | P13726 | CVD II              | 100.00%    |
| CD59 glycoprotein                                                       | CD59           | P13987 | C-Met               | 100.00%    |
| L-selectin                                                              | SELL           | P14151 | C-Met               | 100.00%    |
| Macrophage migration inhibitory factor                                  | MIF            | P14174 | Dev                 | 100.00%    |
| Hepatocyte growth factor                                                | HGF            | P14210 | Inf, Onc II         | 100%, 100% |
| Carboxypeptidase M                                                      | CPM            | P14384 | Neuro               | 99.90%     |
| Nidogen-1                                                               | NID1           | P14543 | C-Met               | 100.00%    |
| Interleukin-1 receptor type 1                                           | IL-1RT1        | P14778 | CVD III             | 100.00%    |
| Carboxypeptidase A1                                                     | CPA1           | P15085 | CVD III             | 100.00%    |
| Carboxypeptidase B                                                      | CPB1           | P15086 | CVD III             | 100.00%    |
| Fatty acid-binding protein, adipocyte (FABP4)                           | FABP4          | P15090 | CVD III             | 100.00%    |
| Aminopeptidase N                                                        | AP-N           | P15144 | CVD III             | 100.00%    |
| Poliiovirus receptor                                                    | PVR            | P15151 | Neuro               | 99.90%     |
| Interferon gamma receptor 1                                             | IFN-gamma-R1   | P15260 | Onc II              | 100.00%    |
| Arylsulfatase A                                                         | ARSA           | P15289 | Dev                 | 100.00%    |
| Beta-1,4-galactosyltransferase 1                                        | B4GALT1        | P15291 | Dev                 | 100.00%    |
| Ezrin                                                                   | EZR            | P15311 | Neuro               | 100.00%    |
| Folate receptor alpha                                                   | FR-alpha       | P15328 | Onc II              | 100.00%    |
| Granulocyte-macrophage colony-stimulating factor receptor subunit alpha | GM-CSF-R-alpha | P15509 | Neuro               | 100.00%    |
| Amphiregulin                                                            | AREG           | P15514 | Onc II, IR          | 97.42%     |
| Membrane cofactor protein                                               | CD46           | P15529 | C-Met               | 100.00%    |
| Vascular endothelial growth factor A                                    | VEGF-A         | P15692 | Inf, Onc II         | 100%, 100% |
| Arylsulfatase B                                                         | ARSB           | P15848 | Cell-Reg            | 100.00%    |
| Beta-galactoside alpha-2,6-sialyltransferase 1                          | ST6GAL1        | P15907 | C-Met               | 100.00%    |
| P-selectin                                                              | SELP           | P16109 | CVD III             | 100.00%    |
| Aggrecan core protein                                                   | ACAN           | P16112 | Dev                 | 100.00%    |
| Platelet-derived growth factor receptor alpha                           | PDGF-R-alpha   | P16234 | Neuro               | 100.00%    |
| Beta-galactosidase                                                      | GLB1           | P16278 | IR                  | 97.31%     |
| Platelet endothelial cell adhesion molecule                             | PECAM-1        | P16284 | CVD III             | 100.00%    |
| Epithelial cell adhesion molecule                                       | Ep-CAM         | P16422 | CVD III             | 100.00%    |
| Cysteine-rich secretory protein 2                                       | CRISP2         | P16562 | Cell-Reg            | 100.00%    |
| E-selectin                                                              | SELE           | P16581 | CVD III             | 100.00%    |
| Carboxypeptidase E                                                      | CPE            | P16870 | Onc II              | 100.00%    |
| Sphingomyelin phosphodiesterase                                         | SMPD1          | P17405 | Neuro               | 99.90%     |
| Endoglin                                                                | ENG            | P17813 | C-Met               | 95.45%     |
| Galectin-3                                                              | Gal-3          | P17931 | CVD III             | 100.00%    |
| Insulin-like growth factor-binding protein 3                            | IGFBP3         | P17936 | C-Met               | 100.00%    |
| Insulin-like growth factor-binding protein 2                            | IGFBP-2        | P18065 | CVD III             | 100.00%    |
| Intesrin beta-5                                                         | ITGB5          | P18084 | Onc II              | 100.00%    |
| Interleukin-1 receptor antagonist protein                               | IL-1ra         | P18510 | CVD II              | 100.00%    |
| Syndecan-1                                                              | SYND1          | P18827 | Onc II              | 100.00%    |
| Peptidyl-glycine alpha-amidating monooxygenase                          | PAM            | P19021 | C-Met               | 100.00%    |
| Cadherin-2                                                              | CDH2           | P19022 | Met                 | 100.00%    |
| Lymphocyte function-associated antigen 3                                | CD58           | P19256 | Dev                 | 100.00%    |
| Vascular cell adhesion protein 1                                        | VCAM1          | P19320 | C-Met               | 100.00%    |
| Tumor necrosis factor receptor 1                                        | TNF-R1         | P19438 | CVD III             | 100.00%    |
| Follistatin                                                             | FS             | P19883 | CVD II              | 100.00%    |
| Elafin                                                                  | PI3            | P19957 | CVD III             | 98.35%     |
| Thymidine phosphorylase                                                 | TYMP           | P19971 | Met                 | 100.00%    |
| Complement receptor type 2                                              | CR2            | P20023 | C-Met               | 97.62%     |
| Transcobalamin-2                                                        | TCN2           | P20062 | C-Met               | 100.00%    |
| Tumor necrosis factor receptor 2                                        | TNF-R2         | P20333 | CVD III             | 100.00%    |
| Parvalbumin alpha                                                       | PVALB          | P20472 | OD                  | 100.00%    |
| Aromatic-L-amino-acid decarboxylase                                     | DDC            | P20711 | Met                 | 99.90%     |
| Pleiotrophin                                                            | PTN            | P21246 | OD                  | 100.00%    |
| Stem cell factor                                                        | SCF            | P21583 | Inf, CVD II, Onc II | 100%, 100% |
| 5'-nucleotidase                                                         | 5'-NT          | P21589 | Onc II              | 100.00%    |
| Midkine                                                                 | MK             | P21741 | Onc II              | 100.00%    |
| Macrophage scavenger receptor types I and II                            | MSR1           | P21757 | Neuro               | 99.90%     |
| Biglycan                                                                | BGN            | P21810 | Cell-Reg            | 90.49%     |
| Receptor tyrosine-protein kinase erbB-3                                 | ErbB3/HER3     | P21860 | Onc II              | 100.00%    |
| Protein-glutamine gamma-glutamyltransferase 2                           | TGM2           | P21980 | CVD II              | 100.00%    |
| Bone morphogenetic protein 6                                            | BMP-6          | P22004 | CVD II              | 100.00%    |
| Tenascin-X                                                              | TNXB           | P22105 | C-Met               | 94.01%     |
| Cadherin-3                                                              | CDH3           | P22223 | Neuro               | 99.90%     |
| Galanin peptides                                                        | GAL            | P22466 | Met                 | 100.00%    |
| Carbonic anhydrase 4                                                    | CA4            | P22748 | C-Met               | 100.00%    |
| Peptidyl-prolyl cis-trans isomerase B                                   | PIIB           | P23284 | Dev                 | 100.00%    |
| Oligodendrocyte-myelin glycoprotein                                     | OMG            | P23515 | Cell-Reg            | 100.00%    |
| C-type natriuretic peptide                                              | NPPC           | P23582 | OD                  | 99.90%     |
| Corticotropin-releasing factor-binding protein                          | CRHBP          | P24387 | Dev                 | 99.90%     |
| Insulin-like growth factor-binding protein 6                            | IGFBP6         | P24592 | C-Met               | 100.00%    |
| Tenascin                                                                | TNC            | P24821 | C-Met               | 94.32%     |
| Proteinase-activated receptor 1                                         | PAR-1          | P25116 | CVD II              | 99.79%     |

|                                                                          |              |               |             |              |
|--------------------------------------------------------------------------|--------------|---------------|-------------|--------------|
| Tumor necrosis factor receptor superfamily member 6                      | FAS          | P25445        | CVD III     | 100.00%      |
| Cathepsin 5                                                              | CTSS         | P25774        | Neuro       | 100.00%      |
| CD40L receptor                                                           | CD40         | P25942        | Inf         | 100.00%      |
| Protein S100-A4                                                          | S100A4       | P26447        | Onc II      | 90.39%       |
| CD27 antigen                                                             | CD27         | P26842        | Onc II      | 100.00%      |
| Dipeptidyl peptidase 4                                                   | DPPI4        | P27487        | C-Met       | 99.79%       |
| DNA-(apurinic or apyrimidinic site) lyase                                | APEX1        | P27695        | Met         | 93.60%       |
| Calreticulin                                                             | CALR         | P27797        | OD          | 85.74%       |
| Interleukin-1 receptor type 2                                            | IL-1RT2      | P27930        | CVD III     | 98.45%       |
| Cystatin D                                                               | CST5         | P28325        | Inf         | 100.00%      |
| Granulins                                                                | GRN          | P28799        | CVD III     | 100.00%      |
| ADP-ribosyl cyclase/cyclic ADP-ribose hydrolase 1                        | CD38         | P28907        | Neuro       | 100.00%      |
| T-cell surface glycoprotein CD1c                                         | CD1C         | P29017        | Met         | 99.48%       |
| Ephrin type-A receptor 2                                                 | EPHA2        | P29317        | Onc II      | 100.00%      |
| Interleukin-12 subunit beta                                              | IL-12B       | P29460        | Inf         | 100.00%      |
| Interleukin-12                                                           | IL-12        | P29460,P29459 | Neuro       | 99.90%       |
| Peroxiredoxin-5                                                          | PRDX5        | P30044        | IR          | 85.63%       |
| Phosphatidylethanolamine-binding protein 1                               | PEBP1        | P30086        | Dev         | 100.00%      |
| Tyrosine-protein kinase receptor UFO                                     | AXL          | P30530        | CVD III     | 100.00%      |
| Alpha-2-macroglobulin receptor-associated protein                        | Alpha-2-MRAP | P30533        | Neuro       | 99.90%       |
| Syndecan-4                                                               | SDCA         | P31431        | Met         | 100.00%      |
| Protein S100-A11                                                         | S100A11      | P31949        | Onc II      | 100.00%      |
| Glypican-1                                                               | GPC1         | P35052        | Onc II      | 100.00%      |
| Serpin B6                                                                | SERPINB6     | P35237        | Met         | 100.00%      |
| ADM                                                                      | ADM          | P35318        | CVD II      | 100.00%      |
| Thrombospondin-2                                                         | THBS2        | P35442        | CVD II      | 100.00%      |
| Thrombospondin-4                                                         | THBS4        | P35443        | C-Met       | 100.00%      |
| Alpha-L-iduronidase                                                      | IDUA         | P35475        | CVD II      | 100.00%      |
| Tyrosine-protein kinase receptor Tie-1                                   | TIE1         | P35590        | C-Met       | 100.00%      |
| Glutaredoxin-1                                                           | GLRX         | P35754        | Met         | 100.00%      |
| Vascular endothelial growth factor receptor 3                            | VEGFR-3      | P35916        | Onc II      | 86.98%       |
| Vascular endothelial growth factor receptor 2                            | VEGFR-2      | P35968        | Onc II      | 100.00%      |
| Chitinase-3-like protein 1                                               | CHI3L1       | P36222        | CVD III     | 100.00%      |
| Lymphotxin-beta receptor                                                 | LTBR         | P36941        | CVD III     | 100.00%      |
| Serine/threonine-protein kinase receptor R3                              | SKR3         | P37023        | Neuro       | 99.90%       |
| TGF-beta receptor type-2                                                 | TGFR-2       | P37173        | Onc II      | 100.00%      |
| Collagen alpha-1(XVIII) chain                                            | COL18A1      | P39060        | C-Met       | 100.00%      |
| Matrix metalloproteinase-12                                              | MMP-12       | P39900        | CVD III     | 95.25%       |
| Macrophage-capping protein                                               | CAPG         | P40121        | OD          | 98.76%       |
| Alpha-taxilin                                                            | TXL          | P40222        | Onc II      | 99.38%       |
| B-cell antigen receptor complex-associated protein beta chain            | CD79B        | P40259        | Met         | 99.17%       |
| OX-2 membrane glycoprotein                                               | CD200        | P41217        | Neuro       | 100.00%      |
| Protein phosphatase inhibitor 2                                          | PPP1R2       | P41236        | Met         | 100.00%      |
| Neuroblastoma suppressor of tumorigenicity 1                             | NBL1         | P41271        | Neuro       | 100.00%      |
| Folate receptor gamma                                                    | FR-gamma     | P41439        | Onc II      | 100.00%      |
| Caspase-3                                                                | CASP-3       | P42574        | CVD III     | 99.90%       |
| Dipeptidyl aminopeptidase-like protein 6                                 | DPPE         | P42658        | OD          | 99.90%       |
| Leukemia inhibitory factor receptor                                      | LIF-R        | P42702        | Inf         | 100.00%      |
| Lysosomal Pro-X carboxypeptidase                                         | PRCP         | P42785        | C-Met       | 98.66%       |
| C-X-C motif chemokine 5                                                  | CXCL5        | P42830        | Inf         | 100.00%      |
| Cathepsin O                                                              | CTSO         | P43234        | Met         | 100.00%      |
| Tumor necrosis factor receptor superfamily member 4                      | TNFRSF4      | P43489        | Onc II      | 99.79%       |
| Neurogenic locus notch homolog protein 1                                 | NOTCH1       | P46531        | C-Met       | 100.00%      |
| Lymphotactin                                                             | XLCL         | P47992        | CVD II      | 99.90%       |
| Fas antigen ligand                                                       | FasL         | P48023        | Onc II      | 100.00%      |
| Carboxypeptidase A2                                                      | CPA2         | P48052        | Neuro       | 99.90%       |
| Tissue factor pathway inhibitor 2                                        | TFPI-2       | P48307        | Onc II      | 100.00%      |
| Protein NOV homolog                                                      | NOV          | P48745        | Dev         | 100.00%      |
| CD97 antigen                                                             | CD97         | P48960        | Dev         | 100.00%      |
| Cartilage oligomeric matrix protein                                      | COMP         | P49747        | C-Met       | 100.00%      |
| Placenta growth factor                                                   | PGF          | P49763        | CVD II, OD  | 100.00%      |
| Fms-related tyrosine kinase 3 ligand                                     | FR3L         | P49771        | Inf         | 100.00%      |
| Serpin B8                                                                | SERPINB8     | P50452        | Met         | 100.00%      |
| Methionine aminopeptidase 2                                              | MetAP 2      | P50579        | Onc II      | 98.04%       |
| TNF-related apoptosis-inducing ligand                                    | TRAIL        | P50591        | Inf, Onc II | 100%; 99.9%  |
| Basal cell adhesion molecule                                             | BCAM         | P50895        | Dev         | 100.00%      |
| Eotaxin                                                                  | CCL11        | P51671        | Inf, IR     | 100%; 99.79% |
| Amyloid-like protein 1                                                   | APLP1        | P51693        | Met         | 100.00%      |
| Prolargin                                                                | PRELP        | P51888        | CVD II      | 100.00%      |
| Dual specificity mitogen-activated protein kinase kinase 6               | MAP2K6       | P52564        | Cell-Reg    | 96.30%       |
| Ephrin-A4                                                                | EPHA4        | P52798        | Neuro       | 99.90%       |
| Stanniocalcin-1                                                          | STCL         | P52823        | IR          | 100.00%      |
| Thimet oligopeptidase                                                    | THOP1        | P52888        | Met         | 100.00%      |
| Dipeptidyl peptidase 1                                                   | CTSC         | P53634        | Neuro       | 99.90%       |
| Ephrin type-B receptor 4                                                 | EPHB4        | P54760        | CVD III     | 100.00%      |
| Phospholipid transfer protein                                            | PLTP         | P55058        | C-Met       | 100.00%      |
| Mesencephalic astrocyte-derived neurotrophic factor                      | MANF         | P55145        | Neuro       | 99.90%       |
| Cadherin-6                                                               | CDH6         | P55285        | Neuro       | 100.00%      |
| C-C motif chemokine 23                                                   | CCL23        | P55273        | Inf         | 100.00%      |
| C-C motif chemokine 18                                                   | CCL18        | P55774        | C-Met       | 100.00%      |
| Glycoprotein Xg                                                          | XG           | P55808        | Dev         | 99.79%       |
| GDNF family receptor alpha-1                                             | GFR-alpha-1  | P56159        | Neuro       | 99.90%       |
| Galectin-4                                                               | Gal-4        | P56470        | CVD III     | 90.29%       |
| Junctional adhesion molecule B                                           | JAM-B        | P57087        | Neuro       | 100.00%      |
| Protein FAM3B                                                            | FAM3B        | P58499        | IR          | 100.00%      |
| Thymosin beta-10                                                         | TM6SB10      | P63313        | Dev         | 100.00%      |
| Coxsackievirus and adenovirus receptor                                   | CD40R        | P78310        | IR          | 100.00%      |
| Tyrosine-protein phosphatase non-receptor type substrate 1               | SHPS-1       | P78324        | CVD III     | 99.90%       |
| Disintegrin and metalloproteinase domain-containing protein 8            | ADAM8        | P78325        | Onc II      | 99.28%       |
| Glypican-5                                                               | GPC5         | P78333        | Neuro       | 100.00%      |
| Lectin-like oxidized LDL receptor 1                                      | LOX-1        | P78380        | CVD II      | 100.00%      |
| Butyrophilin subfamily 3 member A2                                       | BTN3A2       | P78410        | IR          | 100.00%      |
| Fractalkine                                                              | CX3CL1       | P78423        | Inf         | 100.00%      |
| Interleukin-13 receptor subunit alpha-1                                  | IL13RA1      | P78552        | Dev         | 94.13%       |
| Monocyte chemoattractant protein 2                                       | MCP-2        | P80075        | Inf         | 100.00%      |
| C-X-C motif chemokine 6                                                  | CXCL6        | P80162        | Inf         | 100.00%      |
| Nucleobindin-2                                                           | NUCB2        | P80303        | OD          | 99.79%       |
| Protein delta homolog 1                                                  | DLK-1        | P80370        | CVD III     | 100.00%      |
| Perlecan                                                                 | PLC          | P98160        | CVD III     | 100.00%      |
| CD83 antigen                                                             | CD83         | Q01151        | IR          | 100.00%      |
| ST2 protein                                                              | ST2          | Q01638        | CVD III     | 93.70%       |
| Inactive tyrosine-protein kinase transmembrane receptor ROR1             | ROR1         | Q01973        | Met         | 100.00%      |
| N-acyl ethanolamine-hydrolyzing acid amidase                             | NAAEA        | Q02083        | Neuro       | 99.69%       |
| Contactin-2                                                              | CNTN2        | Q02246        | OD          | 100.00%      |
| Desmocollin-2                                                            | DSC2         | Q02487        | Dev         | 100.00%      |
| Angiopietin-1 receptor                                                   | TIE2         | Q02763        | CVD II      | 100.00%      |
| Peptidyl-prolyl cis-trans isomerase FKBP4                                | FKBP4        | Q02790        | Met         | 100.00%      |
| Transforming growth factor beta receptor type 3                          | TGFB3        | Q03167        | C-Met       | 100.00%      |
| Trefoil factor 2                                                         | TF2          | Q03403        | Met         | 99.90%       |
| Urokinase plasminogen activator surface receptor                         | U-PAR        | Q03405        | CVD III     | 100.00%      |
| Parathyroid hormone/parathyroid hormone-related peptide receptor         | PTH1R        | Q03431        | IR          | 86.04%       |
| Lactoylglutathione lyase                                                 | GLO1         | Q04960        | CVD II      | 100.00%      |
| Sialomucin core protein 24                                               | CD164        | Q04900        | Met         | 100.00%      |
| Tyrosine-protein kinase receptor TYRO3                                   | TYRO3        | Q06418        | Met         | 100.00%      |
| Peroxiredoxin-1                                                          | PRDX1        | Q06830        | IR          | 100.00%      |
| Tumor necrosis factor receptor superfamily member 9                      | TNFRSF9      | Q07011        | Inf         | 100.00%      |
| Cytoskeleton-associated protein 4                                        | CKAP4        | Q07065        | IR          | 100.00%      |
| Early activation antigen CD69                                            | CD69         | Q07108        | Dev         | 100.00%      |
| C-X-C motif chemokine 9                                                  | CXCL9        | Q07325        | Inf         | 100.00%      |
| Trefoil factor 3                                                         | TF3          | Q07654        | CVD III     | 100.00%      |
| Interleukin-10 receptor subunit beta                                     | IL-10RB      | Q08334        | Inf         | 100.00%      |
| Epithelial discoidin domain-containing receptor 1                        | DDR1         | Q08345        | Neuro       | 100.00%      |
| Lactadherin                                                              | MFG8         | Q08431        | Dev         | 100.00%      |
| Testican-1                                                               | SPOCK1       | Q08629        | Neuro       | 100.00%      |
| CMRF35-like molecule 6                                                   | CLM-6        | Q08708        | Neuro       | 99.90%       |
| Polypeptide N-acetylgalactosaminyltransferase 2                          | GALNT2       | Q10471        | Cell-Reg    | 100.00%      |
| CMP-N-acetylneuraminatase-beta-sialosidase-alpha-2,3-sialyltransferase 1 | ST3GAL1      | Q11201        | OD          | 99.69%       |
| EGF-containing fibulin-like extracellular matrix protein 1               | EFGF1        | Q12805        | C-Met       | 100.00%      |
| Contactin-1                                                              | CNTN1        | Q12860        | CVD III     | 100.00%      |
| Tyrosine-protein kinase Mer                                              | MERTK        | Q12866        | CVD II      | 95.76%       |
| BMP and activin membrane-bound inhibitor homolog                         | BAMBI        | Q13145        | OD          | 99.79%       |
| Pappalysin-1                                                             | PAPPA        | Q13219        | CVD II      | 100.00%      |
| Chitotriosidase-1                                                        | CHIT1        | Q13231        | CVD III     | 96.38%       |
| Natural killer cells antigen CD94                                        | KLRD1        | Q13241        | IR          | 92.55%       |
| Semaphorin-3F                                                            | SEMA3F       | Q13275        | Met         | 100.00%      |
| Inactive tyrosine-protein kinase 7                                       | PTK7         | Q13808        | OD          | 94.52%       |
| Receptor-type tyrosine-protein phosphatase 5                             | PTPRS        | Q13332        | C-Met       | 100.00%      |
| Microfibrillar-associated protein 5                                      | MFAP5        | Q13361        | C-Met       | 99.79%       |

|                                                                        |               |               |             |              |
|------------------------------------------------------------------------|---------------|---------------|-------------|--------------|
| Mesothelin                                                             | MSLN          | Q13421        | Onc II      | 99.90%       |
| Interleukin-18 receptor 1                                              | IL-18R1       | Q13478        | Inf         | 100.00%      |
| Eukaryotic translation initiation factor 4E-binding protein 1          | 4E-BP1        | Q13541        | Inf         | 100.00%      |
| CD166 antigen                                                          | ALCAM         | Q13740        | CVD III     | 100.00%      |
| Bleomycin hydrolase                                                    | BLM hydrolase | Q13867        | CVD III     | 100.00%      |
| Pro-interleukin-16                                                     | IL16          | Q14005        | CVD II      | 94.32%       |
| Lysosome membrane protein 2                                            | SCARB2        | Q14108        | Neuro       | 99.90%       |
| Nidogen-2                                                              | NID2          | Q14112        | Dev         | 100.00%      |
| Interleukin-18                                                         | IL-18         | Q14116        | Inf, CVD II | 100%; 99.59% |
| Dystroglycan                                                           | DAG1          | Q14118        | Dev         | 100.00%      |
| Scavenger receptor class F member 1                                    | SCARF1        | Q14162        | Dev         | 100.00%      |
| P-selectin glycoprotein ligand 1                                       | PSGL-1        | Q14242        | CVD II      | 100.00%      |
| Growth arrest-specific protein 6                                       | GAS6          | Q14393        | C-Met       | 100.00%      |
| WAP four-disulfide core domain protein 2                               | WFDC2         | Q14508        | Onc II      | 100.00%      |
| SPARC-like protein 1                                                   | SPARCL1       | Q14515        | C-Met       | 100.00%      |
| LDLR chaperone MESD                                                    | MESDC2        | Q14696        | Dev         | 100.00%      |
| Latent-transforming growth factor beta-binding protein 2               | LTBP2         | Q14767        | C-Met       | 100.00%      |
| Procollagen C-endopeptidase enhancer 1                                 | PCOLCE        | Q15113        | C-Met       | 100.00%      |
| Nodal modulator 1                                                      | NOMO1         | Q15155        | Met         | 100.00%      |
| Serum paraoxonase/arylesterase 2                                       | PON2          | Q15165        | OD          | 94.94%       |
| Paraoxonase                                                            | PON3          | Q15166        | CVD III     | 92.87%       |
| Receptor tyrosine-kinase erbB-4                                        | ERBB4/HER4    | Q15303        | Onc II      | 100.00%      |
| Angiotensin-1                                                          | ANG-1         | Q15389        | CVD II      | 100.00%      |
| Ficolin-2                                                              | FCN2          | Q15485        | C-Met       | 92.36%       |
| Transforming growth factor-beta-induced protein ig-h3                  | TGFB1         | Q15582        | C-Met       | 100.00%      |
| Cystatin-M                                                             | CST6          | Q15828        | Dev         | 100.00%      |
| Clusterin-like protein 1                                               | CLUL1         | Q15846        | Met         | 100.00%      |
| Insulin-like growth factor-binding protein 7                           | IGFBP-7       | Q16270        | CVD III     | 100.00%      |
| NT-3 growth factor receptor                                            | NTRK3         | Q16288        | Neuro       | 99.90%       |
| Laminin subunit alpha-4                                                | LAMA4         | Q16363        | Dev         | 100.00%      |
| BDNF/NT-3 growth factors receptor                                      | NTRK2         | Q16620        | Neuro       | 100.00%      |
| C-C motif chemokine 14                                                 | CCL14         | Q16627        | C-Met       | 100.00%      |
| Prostasin                                                              | PRSS8         | Q16651        | CVD II      | 100.00%      |
| Myelin-oligodendrocyte glycoprotein                                    | MOG           | Q16653        | Cell-Reg    | 100.00%      |
| C-C motif chemokine 15                                                 | CCL15         | Q16663        | CVD III     | 100.00%      |
| Melanoma-derived growth regulatory protein                             | MIA           | Q16674        | Onc II      | 100.00%      |
| Kynureninase                                                           | KYNU          | Q16719        | Neuro       | 100.00%      |
| Glutaminyl-peptide cyclotransferase                                    | GPCT          | Q16769        | C-Met       | 100.00%      |
| Kynurenine-oxoglutarate transaminase 1                                 | KYAT1         | Q16773        | Met         | 100.00%      |
| Carbonic anhydrase IX                                                  | CAIX          | Q16790        | Onc II      | 100.00%      |
| Membrane primary amine oxidase                                         | AOC3          | Q16853        | C-Met       | 99.59%       |
| MHC class I polypeptide-related sequence A/B                           | MIC-A/B       | Q29983,Q29980 | Onc II      | 99.59%       |
| R-spondin-1                                                            | RSP01         | Q2MKA7        | Neuro       | 98.76%       |
| Brorin                                                                 | VWC2          | Q2TAL6        | Neuro       | 99.90%       |
| Protogenin                                                             | PRTG          | Q2VWP7        | Neuro       | 99.90%       |
| Cell adhesion molecule-related/down-regulated by oncogenes             | CADON         | Q2XMG0        | Dev         | 99.79%       |
| Collectin-12                                                           | COLEC12       | Q2KUZ6        | Dev         | 100.00%      |
| Platelet endothelial aggregation receptor 1                            | PEAR1         | Q5VY43        | Dev         | 100.00%      |
| Meteorin-like protein                                                  | METRNL        | Q641Q3        | Met         | 100.00%      |
| Vasorin                                                                | VASN          | Q6EMK4        | C-Met       | 100.00%      |
| Leukocyte-associated immunoglobulin-like receptor 1                    | LAIR1         | Q6GT8X        | Dev         | 100.00%      |
| Leukocyte-associated immunoglobulin-like receptor 2                    | LAIR-2        | Q6IS54        | Neuro       | 99.48%       |
| RGM domain family member B                                             | RGMB          | Q6NW40        | Neuro       | 100.00%      |
| Laylin                                                                 | LAYN          | Q6UX15        | Neuro       | 100.00%      |
| VEGF-co regulated chemokine 1                                          | CXL17         | Q6LX82        | Onc II      | 99.28%       |
| Seizure 6-like protein 2                                               | SEZ6L2        | Q6LXD5        | Cell-Reg    | 100.00%      |
| CMRF35-like molecule 9                                                 | CD300L6       | Q6LXG3        | Dev         | 97.31%       |
| Cysteine-rich with EGF-like domain protein 2                           | CRELD2        | Q6LXH1        | Dev         | 100.00%      |
| Inactive serine protease PAMR1                                         | PAMR1         | Q6LXH9        | Dev         | 100.00%      |
| Leucine-rich repeat neuronal protein 1                                 | LRRN1         | Q6LXK5        | Cell-Reg    | 100.00%      |
| Chordin-like protein 2                                                 | CHRD2         | Q6WN34        | Met         | 95.56%       |
| CD109 antigen                                                          | CD109         | Q6YHK3        | Dev         | 100.00%      |
| Scavenger receptor class A member 5                                    | SCAR5         | Q6ZM12        | Neuro       | 99.90%       |
| Coiled-coil domain-containing protein 80                               | CCDC80        | Q76M96        | Met         | 100.00%      |
| Protein FAM19A5                                                        | FAM19A5       | Q725A7        | Cell-Reg    | 100.00%      |
| Allergin-1                                                             | MILR1         | Q726M3        | IR          | 100.00%      |
| Amphoterin-induced protein 2                                           | AMIGO2        | Q855J2        | Cell-Reg    | 100.00%      |
| Polypeptide N-acetylgalactosaminyltransferase 10                       | GALNT10       | Q85SR1        | OD          | 99.79%       |
| C-type lectin domain family 14 member A                                | CLEC14A       | Q86T13        | Dev         | 100.00%      |
| Scavenger receptor cysteine-rich type 1 protein M130                   | CD183         | Q86W87        | CVD III     | 100.00%      |
| Low-density lipoprotein receptor-related protein 11                    | LRP11         | Q86WZ4        | Met         | 100.00%      |
| Interferon lambda3 receptor 1                                          | IFNL1         | Q8IUS7        | IR          | 99.59%       |
| Plexin domain-containing protein 1                                     | PLXDC1        | Q8IUK5        | OD          | 99.79%       |
| Contactin-4                                                            | CNTN4         | Q8IUV2        | Dev         | 100.00%      |
| SIR2-like protein 2                                                    | SIRT2         | Q8IXJ6        | Inf         | 97.73%       |
| Osteoclast-associated immunoglobulin-like receptor                     | hOSCAR        | Q8IY55        | CVD II      | 100.00%      |
| Cell adhesion molecule 3                                               | CADM3         | Q8N126        | Neuro       | 100.00%      |
| Leukocyte immunoglobulin-like receptor subfamily B member 2            | LILRB2        | Q8N423        | C-Met       | 99.59%       |
| Inactive dipeptidyl peptidase 10                                       | DPPE10        | Q8N608        | IR          | 100.00%      |
| CD177 antigen                                                          | CD177         | Q8N6Q3        | Dev         | 95.56%       |
| Draxin                                                                 | DRAXIN        | Q8NB13        | Neuro       | 100.00%      |
| Sulfatase-modifying factor 2                                           | SUMF2         | Q8NB17        | Met         | 100.00%      |
| Proprotein convertase subtilisin/kexin type 9                          | PCSK9         | Q8NBP7        | CVD III     | 99.79%       |
| Thioredoxin domain-containing protein 5                                | TXNDC5        | Q8NB59        | Met         | 100.00%      |
| Interleukin-27                                                         | IL-27         | Q8NEV9,Q14213 | CVD II      | 100.00%      |
| MAM domain-containing glycosylphosphatidylinositol anchor protein 1    | MOGA1         | Q8NF94        | IR          | 100.00%      |
| Leukocyte immunoglobulin-like receptor subfamily B member 4            | LILRB4        | Q8NH16        | IR          | 100.00%      |
| Leukocyte immunoglobulin-like receptor subfamily B member 1            | LILRB1        | Q8NH16        | C-Met       | 100.00%      |
| Multiple coagulation factor deficiency protein 2                       | MCFD2         | Q8NI22        | Met         | 100.00%      |
| Interleukin-17D                                                        | IL-17D        | Q8TAD2        | CVD II      | 100.00%      |
| CD99 antigen-like protein 2                                            | CD99L2        | Q8TCC2        | Dev         | 100.00%      |
| Cell surface glycoprotein CD200 receptor 1                             | CD200R1       | Q8TD46        | Neuro       | 98.04%       |
| Hepatitis A virus cellular receptor 2                                  | HAVCR2        | Q8TDQ0        | Dev         | 100.00%      |
| CMRF35-like molecule 1                                                 | CLM-1         | Q8TDQ1        | Neuro       | 99.90%       |
| A disintegrin and metalloproteinase with thrombospondin motifs 15      | ADAM15 15     | Q8TE58        | Onc II      | 100.00%      |
| WAP, Kazal, immunoglobulin, Kunitz and NTR domain-containing protein 2 | WF1KN2        | Q8TEU8        | Dev         | 100.00%      |
| Soluble calcium-activated nucleotidase 1                               | CANT1         | Q8WVQ1        | Met         | 100.00%      |
| Insulin-like growth factor-binding protein-like 1                      | IGFBP1        | Q8WX77        | Met         | 100.00%      |
| Protein FAM3C                                                          | FAM3C         | Q92520        | Met         | 100.00%      |
| C-C motif chemokine 17                                                 | CCL17         | Q92583        | CVD II      | 99.90%       |
| Nectin-2                                                               | NECTIN2       | Q92692        | Met         | 100.00%      |
| Tenascin-R                                                             | TN-R          | Q92752        | Neuro       | 100.00%      |
| Secreted frizzled-related protein 3                                    | sFRP-3        | Q92765        | Neuro       | 100.00%      |
| Neuronal cell adhesion molecule                                        | Nr-CAM        | Q92823        | Neuro       | 100.00%      |
| Kallikrein-6                                                           | KLK6          | Q92876        | CVD III     | 100.00%      |
| Tumor necrosis factor receptor superfamily member 14                   | TNFRSF14      | Q92956        | CVD III     | 100.00%      |
| Tumor necrosis factor receptor superfamily member 19L                  | RELTL         | Q96924        | Dev         | 100.00%      |
| Endothelial cell-selective adhesion molecule                           | ESAM          | Q96AP7        | Dev         | 100.00%      |
| Repulsive guidance molecule A                                          | RGMA          | Q96B86        | Neuro       | 100.00%      |
| Kidney injury Molecule                                                 | KIM1          | Q96D42        | CVD II, OD  | 100%; 97.12% |
| Interleukin-17 receptor A                                              | IL-17RA       | Q96F46        | CVD III     | 100.00%      |
| Scavenger receptor class F member 2                                    | SCARF2        | Q96G96        | Neuro       | 99.90%       |
| Brevican core protein                                                  | BCAN          | Q96GW7        | Neuro       | 100.00%      |
| T-cell immunoglobulin and mucin domain-containing protein 4            | TIMD4         | Q96H15        | C-Met       | 91.01%       |
| Kazal-type serine protease inhibitor domain-containing protein 1       | KAZALD1       | Q96I82        | Cell-Reg    | 99.59%       |
| Leucine-rich repeats and immunoglobulin-like domains protein 1         | LRIG1         | Q96IA1        | Met         | 100.00%      |
| Beta-Ala-His dipeptidase                                               | CNDP1         | Q96KN2        | C-Met       | 100.00%      |
| Fc receptor-like protein 1                                             | FCRL1         | Q96LA6        | Met         | 92.77%       |
| Sialic acid-binding Ig-like lectin 10                                  | SGLEC10       | Q96LC7        | Cell-Reg    | 100.00%      |
| Nectin-4                                                               | PVR14         | Q96N9B        | Onc II      | 99.90%       |
| WAP, Kazal, immunoglobulin, Kunitz and NTR domain-containing protein 1 | WF1KN1        | Q96N28        | Neuro       | 92.25%       |
| Discoidin, CUB and LCCL domain-containing protein 2                    | DCBLD2        | Q96PD2        | IR          | 93.38%       |
| Secretoglobin family 3A member 2                                       | SCGB3A2       | Q96PL1        | CVD III     | 86.98%       |
| VPS10 domain-containing receptor SorCS2                                | SORCS2        | Q96PQ0        | Cell-Reg    | 100.00%      |
| Probable carboxypeptidase X1                                           | CPXM1         | Q96SM3        | Cell-Reg    | 100.00%      |
| Proheparin-binding EGF-like growth factor                              | HB-EGF        | Q99075        | CVD II      | 100.00%      |
| Protein dephosphatase DJ-1                                             | PAAR7         | Q99497        | Dev         | 100.00%      |
| Sortilin                                                               | SORT1         | Q99523        | CVD II      | 100.00%      |
| Legumain                                                               | LGMM          | Q99538        | Dev         | 100.00%      |
| Oncostatin-M-specific receptor subunit beta                            | OSMR          | Q99650        | C-Met       | 99.90%       |
| Mothers against decapentaplegic homolog 5                              | MAD homolog 5 | Q99717        | Onc II      | 100.00%      |
| Metalloproteinase inhibitor 4                                          | TIMP4         | Q99727        | CVD III     | 100.00%      |
| C-C motif chemokine 19                                                 | CCL19         | Q99731        | Inf         | 100.00%      |
| Chymotrypsin C                                                         | CTRC          | Q99895        | CVD II      | 98.86%       |
| Retinoic acid receptor responder protein 2                             | RARRS2        | Q99969        | CVD III     | 100.00%      |
| Myocilin                                                               | MYOC          | Q99972        | Dev         | 100.00%      |
| Osteomodulin                                                           | OMD           | Q99983        | Dev         | 100.00%      |
| Growth/differentiation factor 15                                       | GDF-15        | Q99988        | CVD III     | 100.00%      |

|                                                                          |             |               |                  |            |
|--------------------------------------------------------------------------|-------------|---------------|------------------|------------|
| Sclerostin                                                               | SOST        | Q9BQ84        | Met              | 100.00%    |
| Serine protease 27                                                       | PRSS27      | Q9BQR3        | CVD II           | 100.00%    |
| Calsyntenin-3                                                            | CLSTN3      | Q9BQT9        | Cell-Reg         | 100.00%    |
| Spondin-2                                                                | SPON2       | Q9BU06        | CVD II           | 100.00%    |
| Brother of CDO                                                           | Protein BOC | Q9BVV1        | CVD II, Cell-Reg | 100%, 100% |
| Complement C1q tumor necrosis factor-related protein 1                   | CL1QTNF1    | Q9BK11        | C-Met            | 100.00%    |
| C-type lectin domain family 7 member A                                   | CLEC7A      | Q9BXN2        | IR               | 99.28%     |
| Complement factor H-related protein 5                                    | CFHR5       | Q9BXR6        | C-Met            | 100.00%    |
| R-spondin-3                                                              | RSP03       | Q9BYX4        | Onc II           | 100.00%    |
| Angiopoietin-related protein 4                                           | ANGPTL4     | Q9BY76        | Dev              | 100.00%    |
| Seizure 6-like protein                                                   | SEZ6L       | Q9BYH1        | Onc II           | 100.00%    |
| Regenerating islet-derived protein 4                                     | REG4        | Q9BY28        | Met              | 100.00%    |
| NKG2D ligand 2                                                           | NZDL-2      | Q9BZM5        | Neuro            | 99.90%     |
| Retinulon-4 receptor                                                     | RTN4R       | Q9BZ66        | Met              | 100.00%    |
| Natural killer cell receptor 2B4                                         | CD244       | Q9BZ78        | Inf              | 99.48%     |
| Sialoadhesin                                                             | SIGLEC1     | Q9BZ22        | Neuro            | 99.90%     |
| Semaphorin-4C                                                            | SEMA4C      | Q9C0C4        | Cell-Reg         | 99.90%     |
| Tubulointerstitial nephritis antigen-like                                | TIGL1       | Q9GZM7        | Met              | 100.00%    |
| SUT and NTRK-like protein 2                                              | SUTRK2      | Q9H156        | Cell-Reg         | 100.00%    |
| Multiple epidermal growth factor-like domains protein 9                  | MEGF9       | Q9H1U4        | C-Met            | 100.00%    |
| C-X-C motif chemokine 16                                                 | CXCL16      | Q9H2A7        | CVD III          | 100.00%    |
| Transmembrane protease-serine 5                                          | TMPRSS5     | Q9H353        | Neuro            | 100.00%    |
| SPARC-related modular calcium-binding protein 2                          | SMOC2       | Q9H3U7        | Neuro            | 100.00%    |
| Calsyntenin-2                                                            | CLSTN2      | Q9H4D0        | Met              | 100.00%    |
| CUB domain-containing protein 1                                          | CDCP1       | Q9H5V8        | Inf              | 100.00%    |
| SUT and NTRK-like protein 6                                              | SUTRK6      | Q9H5Y7        | Cell-Reg         | 91.83%     |
| CXADR-like membrane protein                                              | CLMP        | Q9H6B4        | Met              | 100.00%    |
| Tumor necrosis factor receptor superfamily member 27                     | EDA2R       | Q9H4V5        | Neuro            | 99.90%     |
| Interleukin-1 receptor-like 2                                            | IL1RL2      | Q9H829        | CVD II           | 99.79%     |
| T-lymphocyte surface antigen Ly-9                                        | LY9         | Q9H8G7        | Onc II           | 89.88%     |
| Spondin-1                                                                | SPON1       | Q9HC86        | CVD III          | 100.00%    |
| Roundabout homolog 2                                                     | ROBO2       | Q9HCK4        | Neuro            | 99.90%     |
| Plexin-A4                                                                | PLX4        | Q9HCM2        | IR               | 100.00%    |
| Resistin                                                                 | RETN        | Q9H089        | CVD III          | 100.00%    |
| CD209 antigen                                                            | CD209       | Q9NXX6        | Dev              | 100.00%    |
| Tumor necrosis factor receptor superfamily member 12A                    | TNFRSF12A   | Q9NP84        | Neuro            | 99.90%     |
| Triggering receptor expressed on myeloid cells 1                         | TREM1       | Q9NP99        | IR               | 98.76%     |
| Lysophosphatidic acid phosphatase type 6                                 | ACPF6       | Q9NP9D        | Met              | 100.00%    |
| Complement component C1q receptor                                        | CD93        | Q9NPY3        | CVD III          | 100.00%    |
| Endothelial cell-specific molecule 1                                     | ESM-1       | Q9NQ30        | Onc II           | 100.00%    |
| Cartilage acidic protein 1                                               | CRTAC1      | Q9NQ79        | C-Met            | 100.00%    |
| Fructose-2,6-bisphosphatase TIGAR (TIGAR)                                | TIGAR       | Q9NQ88        | OD               | 88.43%     |
| Neural proliferation differentiation and control protein 1               | NPDC1       | Q9NQX5        | Met              | 100.00%    |
| Neutral ceramidase                                                       | N-Cdase     | Q9NR71        | Neuro            | 99.69%     |
| C-C motif chemokine 28                                                   | CCL28       | Q9NRJ3        | Inf              | 97.00%     |
| Interleukin-17 receptor B                                                | IL17RB      | Q9NRM6        | Cell-Reg         | 100.00%    |
| Tumor necrosis factor receptor superfamily member 19                     | TNFRSF19    | Q9NS68        | Onc II           | 100.00%    |
| Fibroblast growth factor 21                                              | FGF-21      | Q9NSA1        | Cell-Reg         | 86.76%     |
| Phosphoprotein associated with glycosphingolipid-enriched microdomains 1 | PAG1        | Q9NWG8        | Met              | 100.00%    |
| C-type lectin domain family 5 member A                                   | CLECSA      | Q9NY25        | Met              | 100.00%    |
| Podocalyxin-like protein 2                                               | PODXL2      | Q9NZ53        | Cell-Reg         | 100.00%    |
| Programmed cell death 1 ligand 1                                         | PD-L1       | Q9NZQ7        | Inf              | 100.00%    |
| Cysteine-rich motor neuron 1 protein                                     | CRIM1       | Q9NZV1        | Dev              | 100.00%    |
| Kallikrein-14                                                            | hK14        | Q9P0C3        | Onc II           | 96.80%     |
| Disintegrin and metalloprotease domain-containing protein 22             | ADAM 22     | Q9P0K1        | Neuro            | 100.00%    |
| C-type lectin domain family 1 member B                                   | CLEC1B      | Q9P126        | Neuro            | 97.52%     |
| Dickkopf-related protein 3                                               | DKK3        | Q9UBP4        | Dev              | 100.00%    |
| Cathepsin Z                                                              | CTSZ        | Q9UBR2        | CVD III          | 100.00%    |
| Dickkopf-related protein 4                                               | Dkk-4       | Q9UBT3        | Neuro            | 99.90%     |
| Cathepsin F                                                              | CTSF        | Q9UBX1        | Dev              | 100.00%    |
| Kallikrein-11                                                            | hK11        | Q9UBX7        | Onc II           | 100.00%    |
| Macrophage receptor MARCO                                                | MARCO       | Q9UEW3        | CVD II           | 100.00%    |
| Contactin-associated protein-like 2                                      | CNTNAP2     | Q9UN65        | IR               | 100.00%    |
| Epidermal growth factor-like protein 7                                   | EGFL7       | Q9UH11        | OD               | 99.59%     |
| Dipeptidyl peptidase 2                                                   | DPP7        | Q9UHL4        | Met              | 99.48%     |
| Adhesion G protein-coupled receptor E2                                   | ADGRE2      | Q9UHX3        | Met              | 100.00%    |
| SLAM family member 5                                                     | CD84        | Q9UIB8        | CVD II           | 99.38%     |
| Paired immunoglobulin-like type 2 receptor beta                          | PILRB       | Q9UKJ0        | Met              | 100.00%    |
| Paired immunoglobulin-like type 2 receptor alpha                         | PILRA       | Q9UKJ1        | Dev              | 100.00%    |
| ADP-sugar pyrophosphatase                                                | NUDT5       | Q9UKK9        | Dev              | 97.93%     |
| Kallikrein-13                                                            | KLK13       | Q9UKR3        | Onc II           | 100.00%    |
| Plexin-B3                                                                | PLXNB3      | Q9ULL4        | Neuro            | 100.00%    |
| Carbonic anhydrase 14                                                    | CA14        | Q9ULX7        | OD               | 99.79%     |
| Neurogenic locus notch homolog protein 3                                 | Notch 3     | Q9UM47        | CVD III          | 100.00%    |
| Tumor necrosis factor receptor superfamily member EDAR                   | EDAR        | Q9UNE0        | IR               | 99.07%     |
| Syntaxin-8                                                               | STX8        | Q9UNK0        | OD               | 99.79%     |
| C-type lectin domain family 11 member A                                  | CLEC11A     | Q9Y240        | Dev              | 100.00%    |
| Tumor necrosis factor ligand superfamily member 13B                      | TNFSF13B    | Q9Y275        | CVD III          | 100.00%    |
| V-set and immunoglobulin domain-containing protein 4                     | VSIG4       | Q9Y279        | Dev              | 99.90%     |
| Sialic acid-binding te-like lectin 7                                     | SIGLEC7     | Q9Y286        | Met              | 100.00%    |
| Sialic acid-binding te-like lectin 9                                     | Siglec-9    | Q9Y336        | Neuro            | 100.00%    |
| CD2-associated protein                                                   | CD2AP       | Q9YSK6        | Met              | 92.67%     |
| Ectonucleoside triphosphate diphosphohydrolase 2                         | ENTPD2      | Q9Y5L3        | OD               | 99.48%     |
| Wnt inhibitory factor 1                                                  | WIF-1       | Q9Y5W5        | Onc II           | 100.00%    |
| Lymphatic vessel endothelial hyaluronin acid receptor 1                  | LYVE1       | Q9Y5Y7        | C-Met            | 100.00%    |
| Junctional adhesion molecule A                                           | JAM-A       | Q9Y624        | CVD III          | 100.00%    |
| Adhesion G-protein coupled receptor G1                                   | ADGRG1      | Q9Y653        | OD               | 99.38%     |
| Roundabout homolog 1                                                     | ROBO1       | Q9Y6N7        | Dev              | 100.00%    |
| Tumor necrosis factor receptor superfamily member 11A                    | TNFRSF11A   | Q9Y6Q6        | CVD II           | 100.00%    |
| Delta and Notch-like epidermal growth factor-related receptor            | DNER        | Q9NFT8        | Inf              | 100.00%    |
| Transmembrane glycoprotein NMB                                           | GNPMB       | Q14556        | Onc II           | 100.00%    |
| Galactoside 3(4)-L-fucosyltransferase,Alpha-(1,3)-fucosyltransferase 3/5 | (FUT3/5)    | Q11128,P21217 | Dev              | 95.86%     |
| Fibroblast growth factor 5 (FGF-5)                                       | FGF-5       | P12034        | Inf              | 100.00%    |

Table shows those proteins that passed the quality control criteria and were detected in more than 85% of the samples. Panel Key: CVD II = Cardiovascular disease II; CVD III = Cardiovascular disease III; C-Met = Cardiometabolic; Cell-Reg = Cell Regulation; Dev = Development; Inf = Inflammation; IR = Immune Response; I/O = Immuno-Oncology; Met = Metabolism; Neuro = Neurology; OD = Organ Damage; Onc II = Oncology II

**Supplementary Table 3. Quality parameters of custom PEA assays**

| <b>Protein name</b>                 | <b>Assay</b> | <b>Uniport</b> | <b>LOD</b> | <b>CSF missingness (%)</b> | <b>Intra-CV (%)</b> | <b>Inter-CV (%)</b> |
|-------------------------------------|--------------|----------------|------------|----------------------------|---------------------|---------------------|
| Aromatic-L-amino-acid decarboxylase | DDC          | P20711         | 1.98       | 1%                         | 5%                  | 8%                  |
| Corticoliberin                      | CRH          | P06850         | 1.60       | 1%                         | 7%                  | 18%                 |
| Matrix metalloproteinase-3          | MMP-3        | P08254         | 0.38       | 1%                         | 4%                  | 8%                  |
| Tyrosine-protein kinase ABL1        | ABL1*        | P00519         | 1.01       | 10%                        | 5%                  | 2%                  |
| Matrix metalloproteinase-10         | MMP-10       | P09238         | 0.98       | 1%                         | 5%                  | 8%                  |
| Thimet oligopeptidase               | THOP1        | P52888         | 1.38       | 1%                         | 5%                  | 8%                  |
|                                     |              |                | Mean       | 3%                         | 5%                  | 9%                  |

CSF missingness is the % of samples whose values were < the corresponding LOD. CVs calculated using quality control samples. \*For ABL1 CVs were calculated using assay calibrators, as QC samples reported values < LOD. LOD, Lower limit of detection. CV, coefficient of variation.
